# Supplementary material
Source: PubMed Central journal article supplement (PMC4790771)
Supplement: kinm006267.ww1_default.pdf [file kinm006267.ww1_default.pdf]

## Appendix: Schools and Policy Adoption Categorizations

| Adopted by 2004 | Adopted in 2008 | Verified but N/A | Unable to Verify | Medical School                                                       |
|-----------------|-----------------|------------------|------------------|----------------------------------------------------------------------|
|                 |                 | √                |                  | Albany Medical College                                               |
|                 |                 | √                |                  | Albert Einstein College of Medicine of Yeshiva University            |
| √               |                 |                  |                  | Baylor College of Medicine                                           |
|                 |                 | √                |                  | Boston University School of Medicine                                 |
|                 |                 | √                |                  | Brody School of Medicine at East Carolina University                 |
|                 |                 | √                |                  | Case Western Reserve University School of Medicine                   |
|                 |                 | √                |                  | Columbia University College of Physicians and Surgeons               |
|                 |                 |                  | √                | Creighton University School of Medicine                              |
| √               |                 |                  |                  | Dartmouth Medical School                                             |
| √               |                 |                  |                  | David Geffen School of Medicine at UCLA                              |
|                 |                 | √                |                  | Drexel University College of Medicine                                |
|                 |                 | √                |                  | Duke University School of Medicine                                   |
|                 |                 |                  |                  | East Tennessee State University James H. Quillen College of Medicine |
|                 |                 | √                |                  | Eastern Virginia Medical School                                      |
|                 |                 | √                |                  | Emory University School of Medicine                                  |
|                 |                 |                  | √                | Florida Atlantic University Schmidt College of Medicine              |
|                 |                 |                  | √                | Florida International University College of Medicine                 |
|                 |                 | √                |                  | Florida State University College of Medicine                         |
|                 |                 | √                |                  | George Washington University Medical School                          |
|                 | √               |                  |                  | Georgetown University School of Medicine                             |
|                 |                 | √                |                  | Harvard Medical School                                               |
|                 |                 | √                |                  | Hofstra University North Shore–LIJ School of Medicine                |
|                 |                 | √                |                  | Howard University College of Medicine                                |
|                 |                 | √                |                  | Indiana University School of Medicine                                |
|                 |                 |                  | √                | Jefferson Medical College of Thomas Jefferson University             |
|                 |                 |                  |                  | Joan C. Edwards School of Medicine at Marshall University            |
|                 |                 | √                |                  | Johns Hopkins University School of Medicine                          |
|                 |                 |                  |                  | Keck School of Medicine of University of Southern California         |
|                 |                 |                  | √                | Loma Linda University School of Medicine                             |
|                 |                 |                  |                  | Louisiana State University School of Medicine in New Orleans         |
|                 |                 |                  |                  | Louisiana State University School of Medicine in Shreveport          |
|                 |                 | √                |                  | Loyola University Chicago Stritch School of Medicine                 |
|                 |                 | √                |                  | Mayo Clinic College of Medicine                                      |
|                 |                 | √                |                  | Medical College of Georgia School of Medicine                        |
|                 |                 | √                |                  | Medical College of Wisconsin                                         |
|                 |                 |                  | √                | Medical University of South Carolina College of Medicine             |
|                 |                 | √                |                  | Meharry Medical College School of Medicine                           |
|                 | √               |                  |                  | Mercer University School of Medicine                                 |
|                 | √               |                  |                  | Michigan State University College of Human Medicine                  |

|   |   |                                                                                                  |
|---|---|--------------------------------------------------------------------------------------------------|
|   | √ | Morehouse School of Medicine                                                                     |
| √ |   | Mount Sinai School of Medicine                                                                   |
|   | √ | New York Medical College                                                                         |
| √ |   | New York University School of Medicine                                                           |
|   | √ | Northeast Ohio Medical University                                                                |
|   | √ | Northwestern University Feinberg School of Medicine                                              |
|   |   | Oakland University William Beaumont School of Medicine                                           |
|   | √ |                                                                                                  |
|   | √ | Oregon Health & Science University School of Medicine                                            |
| √ |   | Pennsylvania State University College of Medicine                                                |
|   |   | Perelman School of Medicine at the University of Pennsylvania                                    |
|   | √ |                                                                                                  |
|   | √ | Rosalind Franklin University - Chicago Medical School                                            |
|   | √ | Rush Medical College                                                                             |
|   | √ | Saint Louis University School of Medicine                                                        |
|   |   | Sanford School of Medicine of the University of South Dakota                                     |
|   | √ |                                                                                                  |
|   | √ | Southern Illinois University School of Medicine                                                  |
|   | √ | Stanford University School of Medicine                                                           |
|   |   | State University of New York at Stony Brook School of Medicine                                   |
|   | √ |                                                                                                  |
|   | √ | State University of New York Downstate Medical Center College of Medicine                        |
| √ |   | State University of New York Upstate Medical University                                          |
|   |   | Temple University School of Medicine                                                             |
|   | √ |                                                                                                  |
|   | √ | Texas A&M Health Science Center College of Medicine                                              |
|   |   | Texas Tech University Health Sciences Center Paul L. Foster School of Medicine                   |
|   | √ |                                                                                                  |
|   | √ | Texas Tech University Health Sciences Center School of Medicine                                  |
|   | √ | The Commonwealth Medical College                                                                 |
|   | √ | The Ohio State University College of Medicine                                                    |
|   |   | The University of Iowa Roy J. and Lucille A. Carver College of Medicine                          |
|   | √ | The Wright State University Boonshoft School of Medicine                                         |
| √ |   |                                                                                                  |
|   | √ | Tufts University School of Medicine                                                              |
|   | √ | Tulane University School of Medicine                                                             |
| √ |   | UC Davis School of Medicine                                                                      |
| √ |   | UC San Diego School of Medicine                                                                  |
|   |   | Uniformed Services University of the Health Sciences F. Edward Hebert School of Medicine         |
| √ |   | University at Buffalo, The State University of New York School of Medicine & Biomedical Sciences |
|   | √ |                                                                                                  |
|   | √ | University of Alabama School of Medicine                                                         |
|   | √ | University of Arizona College of Medicine                                                        |
|   |   | University of Arkansas for Medical Sciences/UAMS College of Medicine                             |
| √ | √ |                                                                                                  |
| √ |   | University of California, Irvine School of Medicine                                              |
| √ |   | University of California, San Francisco School of Medicine                                       |
|   |   |                                                                                                  |
|   | √ | University of Central Florida College of Medicine                                                |

|   |   |                                                                                            |
|---|---|--------------------------------------------------------------------------------------------|
|   | √ | University of Chicago Pritzker School of Medicine                                          |
|   | √ | University of Cincinnati College of Medicine                                               |
|   | √ | University of Colorado Denver School of Medicine                                           |
| √ |   | University of Connecticut School of Medicine                                               |
|   | √ | University of Florida College of Medicine                                                  |
|   | √ | University of Hawaii John A. Burns School of Medicine                                      |
| √ |   | University of Illinois College of Medicine--Chicago                                        |
| √ |   | University of Illinois College of Medicine--Peoria                                         |
| √ |   | University of Illinois College of Medicine--Urbana                                         |
|   | √ | University of Kansas School of Medicine                                                    |
|   | √ | University of Kentucky College of Medicine                                                 |
|   | √ | University of Louisville School of Medicine                                                |
|   | √ | University of Maryland School of Medicine                                                  |
|   | √ | University of Massachusetts Medical School                                                 |
|   | √ | University of Medicine and Dentistry of New Jersey –<br>New Jersey Medical School          |
|   | √ | University of Medicine and Dentistry of New Jersey –<br>Robert Wood Johnson Medical School |
|   | √ | University of Medicine and Dentistry of New Jersey –<br>School of Osteopathic Medicine     |
|   | √ | University of Miami Miller School of Medicine                                              |
|   | √ | University of Michigan Medical School                                                      |
|   | √ | University of Minnesota Medical School                                                     |
|   | √ | University of Mississippi School of Medicine                                               |
|   | √ | University of Missouri–Columbia School of Medicine                                         |
|   | √ | University of Missouri–Kansas City School of Medicine                                      |
|   | √ | University of Nebraska College of Medicine                                                 |
|   | √ | University of Nevada School of Medicine                                                    |
|   | √ | University of New Mexico School of Medicine                                                |
|   | √ | University of North Carolina School of Medicine                                            |
|   | √ | University of North Dakota School of Medicine and<br>Health Sciences                       |
|   | √ | University of Oklahoma College of Medicine                                                 |
|   | √ | University of Pittsburgh School of Medicine                                                |
|   | √ | University of Rochester School of Medicine and Dentistry                                   |
|   | √ | University of South Alabama College of Medicine                                            |
|   | √ | University of South Carolina School of Medicine                                            |
|   | √ | University of South Florida College of Medicine                                            |
|   | √ | University of Tennessee College of Medicine                                                |
|   | √ | University of Texas Medical Branch School of Medicine                                      |
|   | √ | University of Texas Medical School at Houston                                              |
|   | √ | University of Texas Medical School at San Antonio                                          |
|   | √ | University of Texas Southwestern Medical School at<br>Dallas                               |
|   | √ | University of Toledo College of Medicine                                                   |
|   | √ | University of Utah School of Medicine                                                      |
|   | √ | University of Vermont College of Medicine                                                  |
|   | √ | University of Virginia School of Medicine                                                  |
|   | √ | University of Washington School of Medicine                                                |

|   |   |                                                              |
|---|---|--------------------------------------------------------------|
|   | √ | University of Wisconsin School of Medicine and Public Health |
| √ |   | Vanderbilt University School of Medicine                     |
| √ |   | Virginia Commonwealth University School of Medicine          |
|   | √ | Virginia Tech Carilion School of Medicine                    |
| √ |   | Wake Forest School of Medicine                               |
|   | √ | Warren Alpert Medical School of Brown University             |
| √ |   | Washington University School of Medicine                     |
| √ |   | Wayne State University School of Medicine                    |
| √ |   | Weill Cornell Medical College of Cornell University          |
|   | √ | West Virginia University School of Medicine                  |
| √ |   | Yale University School of Medicine                           |
